# Supplementary material for: Prognostic impact of diffuse large B-cell lymphoma with extra copies of MYC, BCL2 and/or BCL6: comparison with double/triple hit lymphoma and double expressor lymphoma
Source: Springer Nature journal article supplement (doi:10.1186/s13000-019-0856-7), 2019-07-17
Supplement: MOESM1 [file 16957730]

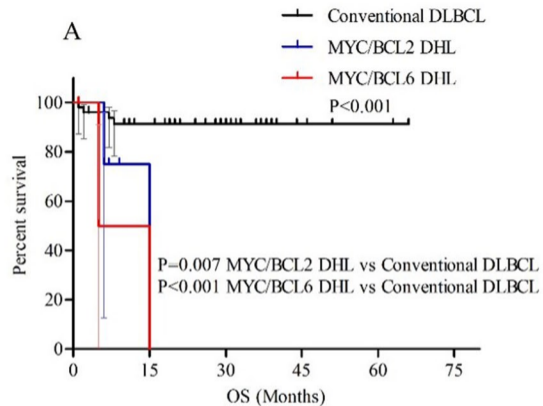

Number at risk

| OS (Months)        | 0  | 15 | 30 | 45 | 60 | 75 |
|--------------------|----|----|----|----|----|----|
| Conventional DLBCL | 53 | 30 | 18 | 7  | 2  | 0  |
| MYC/BCL2 DHL       | 4  | 0  | 0  | 0  | 0  | 0  |
| MYC/BCL6 DHL       | 4  | 0  | 0  | 0  | 0  | 0  |

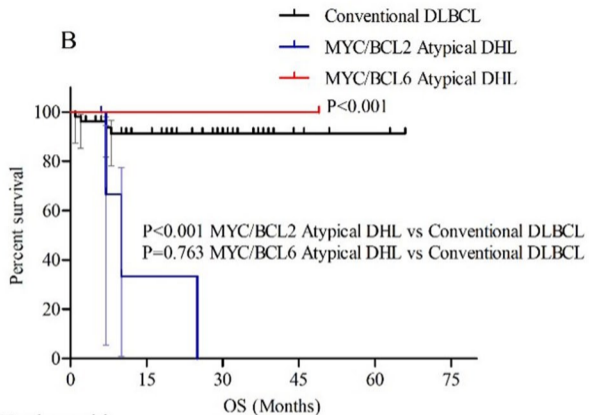

Number at risk

| OS (Months)           | 0  | 15 | 30 | 45 | 60 | 75 |
|-----------------------|----|----|----|----|----|----|
| Conventional DLBCL    | 37 | 25 | 16 | 5  | 2  | 0  |
| MYC/BCL2 Atypical DHL | 4  | 1  | 0  | 0  | 0  | 0  |
| MYC/BCL6 Atypical DHL | 1  | 1  | 1  | 1  | 1  | 1  |
